# Supplementary material for: Importance of data structure in comparing two dimension reduction methods for classification of microarray gene expression data
Source: PubMed Central journal article supplement (PMC1831790; doi:10.1186/1471-2105-8-90), 2007-03-13
Supplement: 1471-2105-8-90-S8.pdf [file 1471-2105-8-90-S8.pdf]

|             | PLS+DA         | PCA+DA          | BGA        |
|-------------|----------------|-----------------|------------|
| Colon       | 0.87(0.06) //2 | 0.83(0.06) //5  | 0.88(0.06) |
| DLBCL vs FL | 0.97(0.03) //3 | 0.96(0.03) //10 | 0.84(0.08) |
| Myeloma     | 0.79(0.10) //1 | 0.72(0.05) //12 | 0.78(0.04) |
| ALL1        | 0.99(0.01) //2 | 0.99(0.01) //5  | 0.99(0.01) |
| ALL2        | 0.57(0.07) //6 | 0.59(0.08) //1  | 0.52(0.07) |
| ALL3        | 0.82(0.07) //4 | 0.59(0.08) //6  | 0.73(0.09) |
